# Supplementary material
Source: PubMed Central journal article supplement (PMC8715381)
Supplement: NIHMS1766243-supplement-Supplementary_information.pdf [file NIHMS1766243-supplement-Supplementary_information.pdf]

Supporting information:

## **Effect of Nanoparticle Synthetic Conditions on Ligand Coating Integrity and Subsequent Nano-Bio Interactions**

Jessica C. Hsu,<sup>1,2</sup> Yu Du,<sup>3</sup> Arjun Sengupta,<sup>4</sup> Yuxi C. Dong,<sup>1,2</sup> Katherine J. Mossburg,<sup>1,2</sup> Mathilde Bouché,<sup>1</sup> Andrew D. A. Maidment,<sup>1</sup> Aalim M. Weljie,<sup>4</sup> and David P. Cormode<sup>1,2\*</sup>

<sup>1</sup>Department of Radiology, University of Pennsylvania, 3400 Spruce St, 1 Silverstein, Philadelphia, PA 19104, USA.

<sup>2</sup>Department of Bioengineering, University of Pennsylvania, Philadelphia, PA, USA.

<sup>3</sup>Division of Gastroenterology and Hepatology, University of Pennsylvania, Philadelphia, PA, USA.

<sup>4</sup>Department of Systems Pharmacology and Translational Therapeutics, University of Pennsylvania, Philadelphia, PA, USA.

\*Corresponding author

E-mail: david.cormode@pennmedicine.upenn.edu; Tel: 215-615-4656; Fax: 215-662-7868

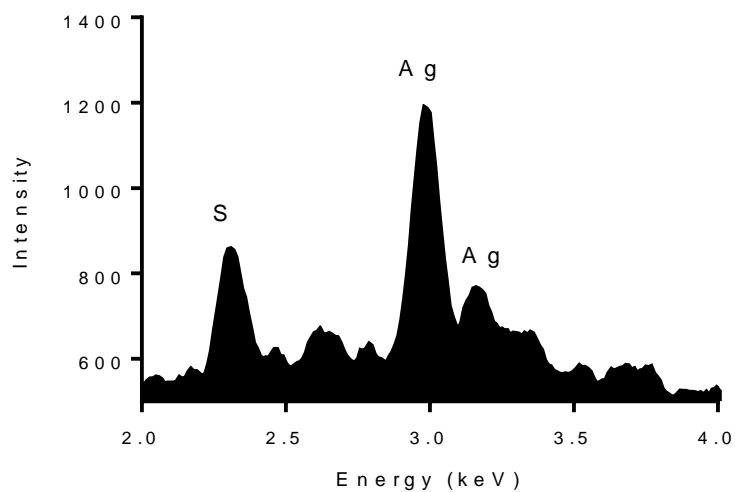

**Figure S1** Energy dispersive X-ray spectroscopy spectrum of 3 nm  $\text{Ag}_2\text{S}$ -NP from Synthesis B.

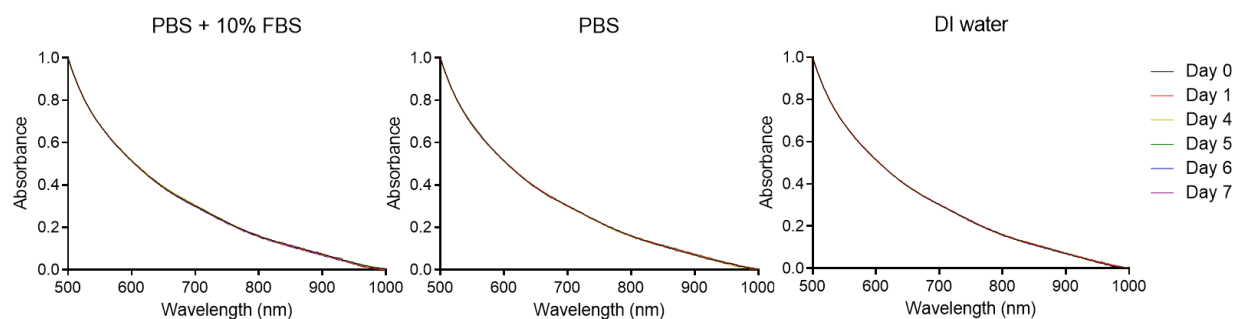

**Figure S2** UV-visible spectroscopy measurements of 3 nm  $\text{Ag}_2\text{S}$ -NP from Synthesis B after incubation in DI water, PBS and PBS supplemented with 10% fetal bovine serum at 37°C for 7 days. Some lines may be difficult to visualize as they overlap with other lines.

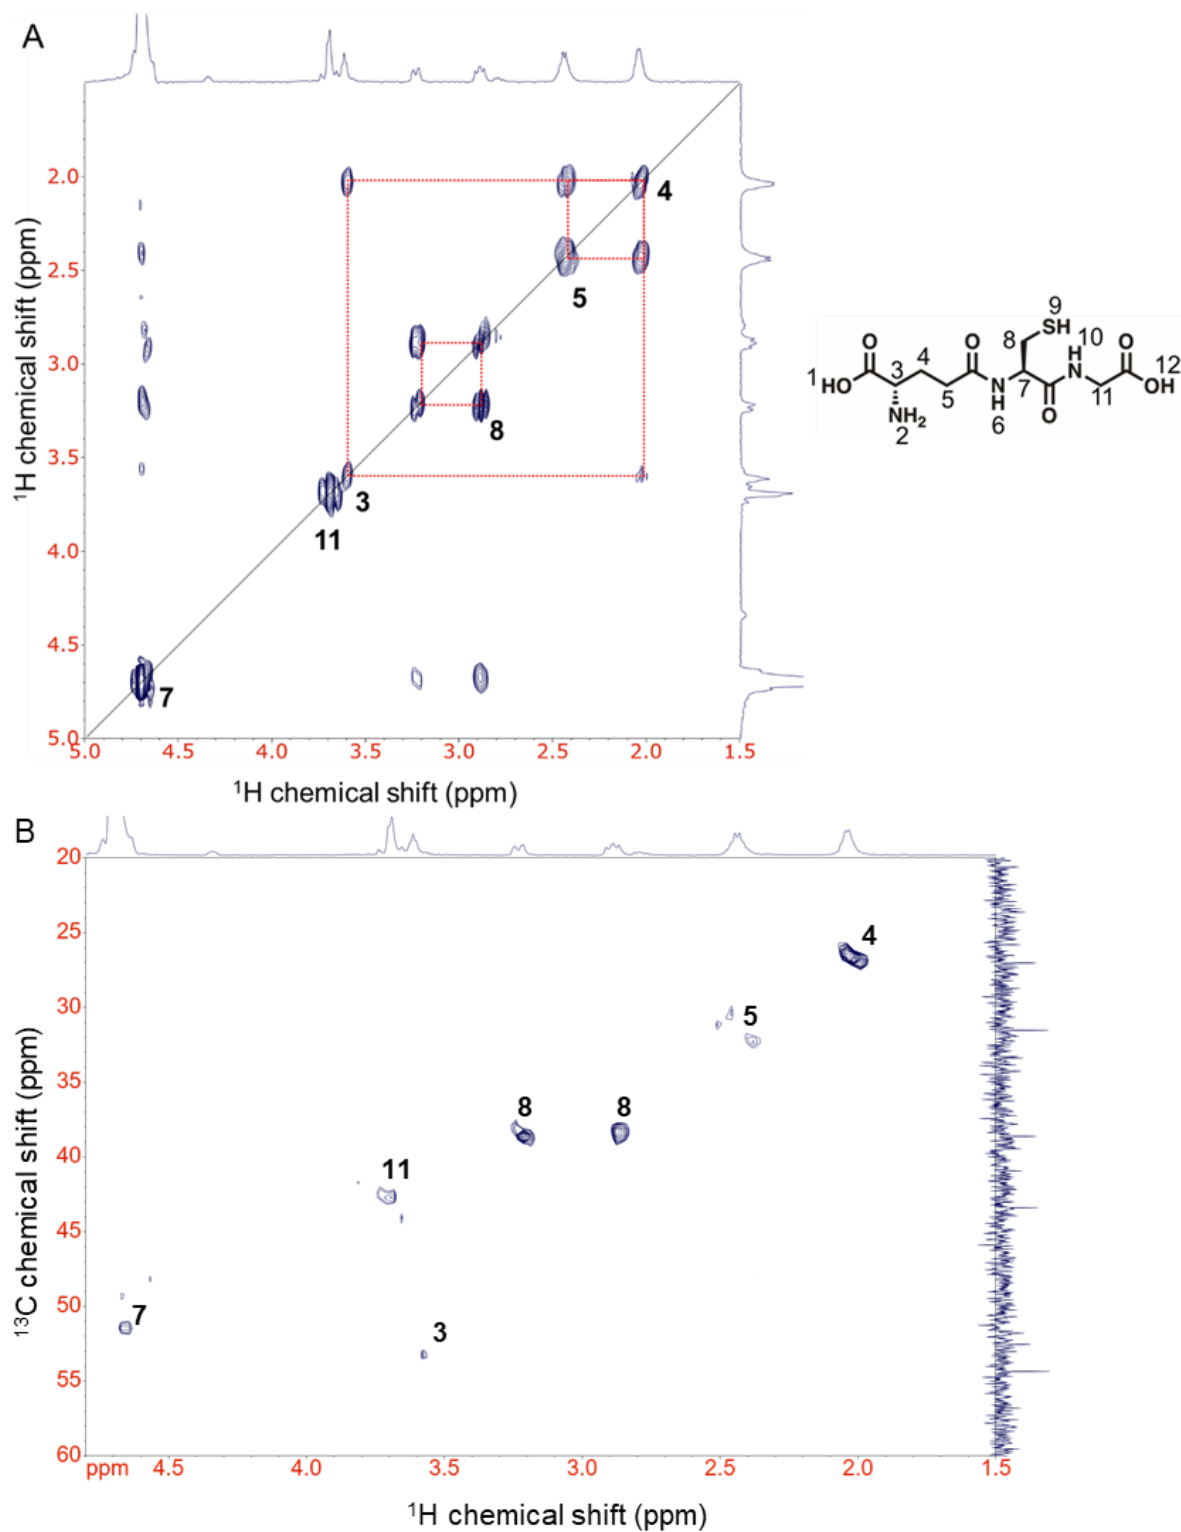

**Figure S3** 2D NMR spectroscopy of 3 nm  $\text{Ag}_2\text{S}$ -NP synthesized from Synthesis B.

(a)  $^1\text{H}$ - $^1\text{H}$  COSY NMR spectrum and (b)  $^1\text{H}$ - $^{13}\text{C}$  HSQC NMR spectrum.

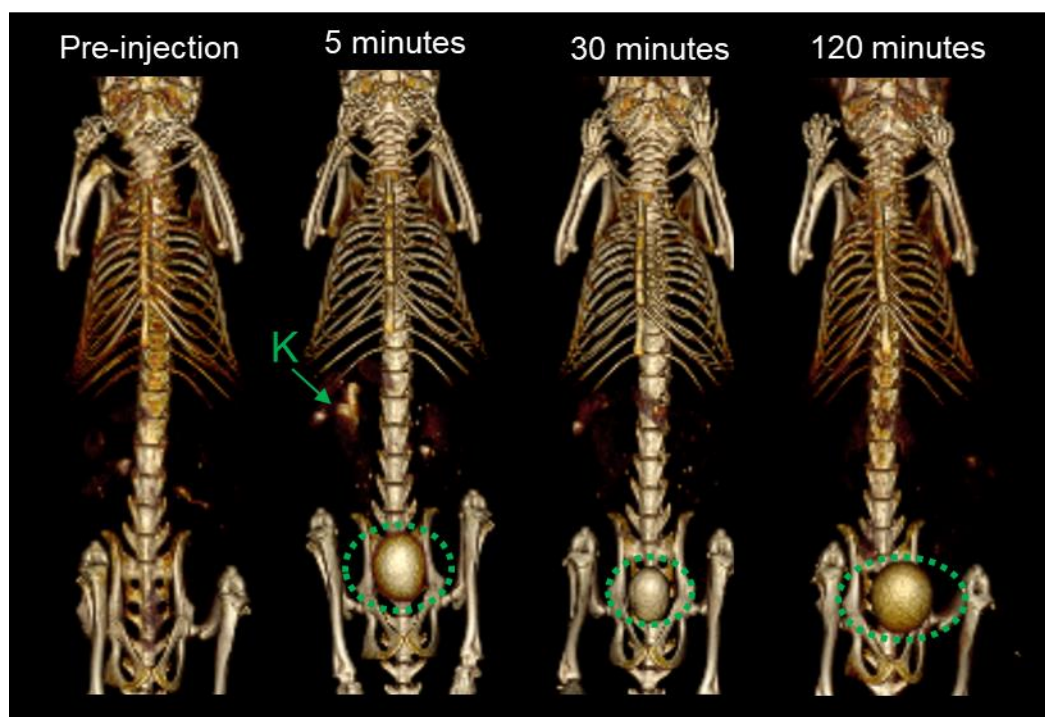

**Figure S4** Representative *in vivo* 3D volume rendered CT images of a mouse injected with Ag<sub>2</sub>S-NP synthesized using high temperature, bulk approach (Synthesis A). The images are shown with a window level of 700 HU and window width of 1000 HU. Kidneys are labeled K. Green circles indicate the bladder.

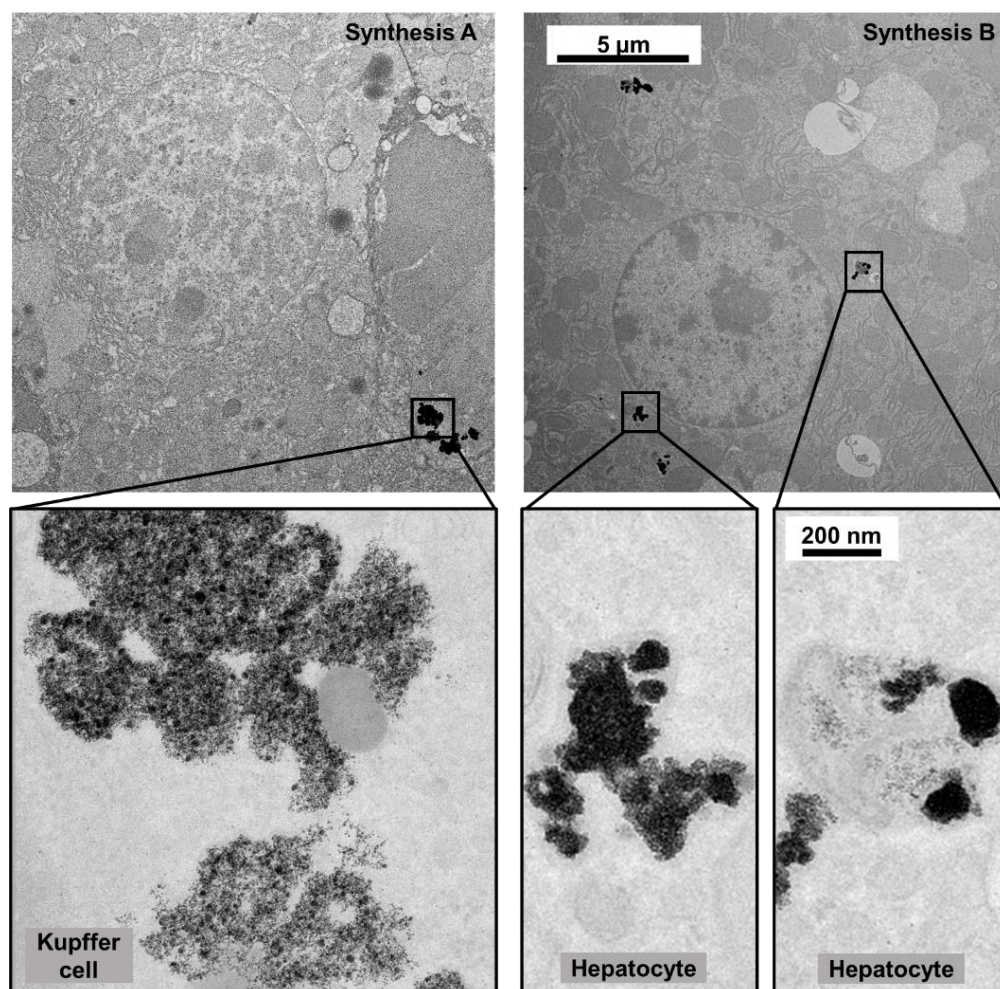

**Figure S5** Electron micrographs of liver sections indicating cellular distribution of different  $\text{Ag}_2\text{S}$ -NP formulations. The scale is indicated in the upper left corner on the rightmost image for each row of images.

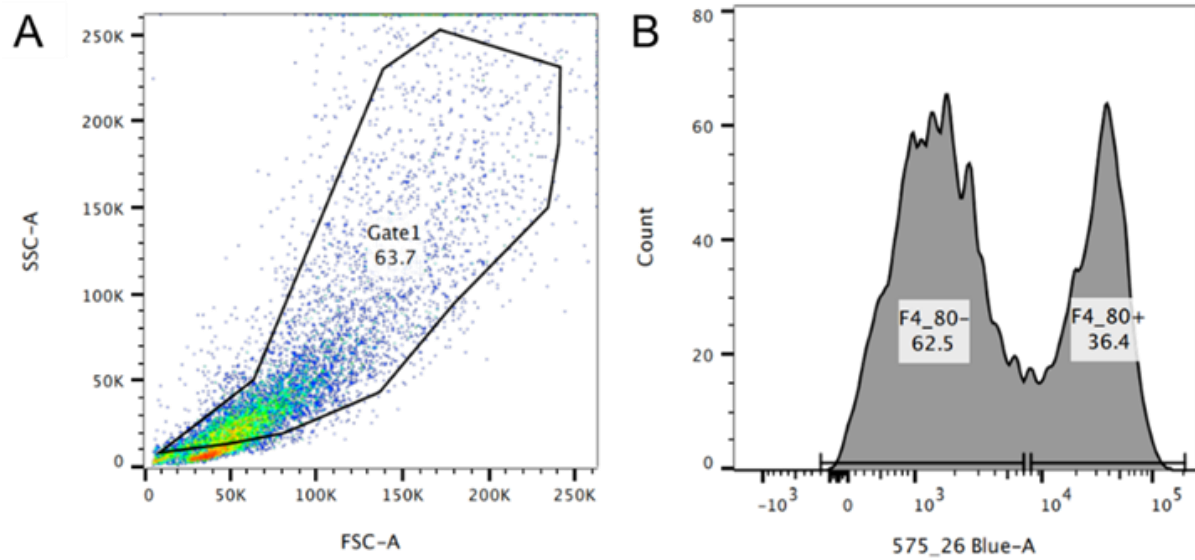

**Figure S6** Flow cytometry for primary Kupffer cells.

(a) Representative flow plot with gating to show (b) percentages of F4/80 positive and negative cells in the total nonparenchymal cell population after purification. SSC: side scatter; FSC: forward scatter.
